# Supplementary material for: Constructing a tetraphenylethene (TPE) derivative-decorated polyvinyl alcohol (PVA)/lanthanide nanoparticle composite system for tunable luminescence
Source: Royal Society of Chemistry journal article supplement (doi:10.1039/d0dt00473a), 2020-01-01
Supplement: d0dt00473a1.pdf [file d0dt00473a1.pdf]

## Supporting Information

Constructing a tetraphenylethene (TPE) derivative decorated polyvinyl alcohol (PVA)/ lanthanide nanoparticles composite system for tunable luminescence

Songyang Huang, Jianbin Wu, Jiale Li, Lirong Yu, Xi Wang\* and Ming Bai

## Captions

**Table S1** Experimental details about the preparation of TPEBA-Ln1 and TPEBA-Ln2

**Table S2** Experimental details about the preparation of TPEBA-Tb-Eu composite materials

**Fig. S1** AIE behavior (a) and plots of the fluorescence intensity at 460 nm (b) of TPEBA dissolved in DMSO/water mixtures with different water fractions ( $\lambda_{\text{ex}}=340$  nm).

**Fig. S2** Fluorescence of the frozen diluted TPEBA solution ( $1.0 \times 10^{-4}$  mol/L) dissolved in DMSO (black line) and TPEBA modified PVA with low amount of TPEBA dispersed in DMSO (red line) respectively.

**Fig. S3** XPS survey (a) and B1s XPS (b) spectra of TPEBA decorated NaTbF<sub>4</sub> nanoparticles.

**Fig. S4** Emission spectrum of the TPEBA decorated  $\beta$ -NaGdF<sub>4</sub> (TPEBA-Gd1: mole ratio of TPEBA and Gd is 4.5; TPEBA-Gd2: mole ratio of TPEBA and Gd is 0.8) and excitation spectrum of PVA-coated  $\beta$ -NaGdF<sub>4</sub>,  $\beta$ -NaTbF<sub>4</sub> and  $\beta$ -NaEuF<sub>4</sub>.

**Fig. S5** Excitation spectrum of the TPEBA-Tb1 and TPEBA-Tb2 ( $\lambda_{\text{em}}=540$  nm) (a); Excitation spectrum of the TPEBA-Eu1 and TPEBA-Eu2 ( $\lambda_{\text{em}}=613$  nm) (b).

**Fig. S6** UV-Vis absorption spectrum of the ligand and (b) phosphorescence spectrum of TPEBA-Gd2 at 77 K.

**Fig. S7** Schematic representation of the energy transfer process between ligand to Ln<sup>3+</sup>.

**Fig. S8** Powder XRD patterns and TEM images of TPEBA-decorated lanthanide nanoparticles with different mole ratio of TPEBA, Tb<sup>3+</sup> and Eu<sup>3+</sup>.

**Fig. S9** Hydrodynamic radius distributions of PVA-1(a) and PVA-2(b) in DMSO (4mg/mL).

**Fig. S10** The changes in the intensity of the emission peak assigned to the TPEBA (maximum peak from 400nm to 470 nm), and the luminescence belonged to Eu<sup>3+</sup> located at 591.8 nm and 616.2 nm when the increasing concentration of PVA-1 was added into the TPEBA-decorated lanthanide nanoparticles (a); The linear relationship between  $I_{\text{TPEBA}}/I_{\text{Eu}^{3+}}$  and the increasing concentration of PVA-1 (b).

**Fig. S11** The decreasing intensity of the emission peak located at 460.6 nm, 591.8 nm and 616.2 nm when the increasing concentration of PVA-2 was added into the TPEBA-decorated lanthanide nanoparticles (a); Stern-Volmer plots of the quenching (460.6 nm) by PVA-2 (b).

**Table S1** Experimental details about the preparation of TPEBA-Ln1 and TPEBA-Ln2

|                                                 | TPEBA-Gd1 | TPEBA-Tb1 | TPEBA-Eu1 | TPEBA-Gd2 | TPEBA-Tb2 | TPEBA-Eu2 |
|-------------------------------------------------|-----------|-----------|-----------|-----------|-----------|-----------|
| Ligand<br>(0.012 mol/L)                         | 1.0 mL    | 1.0 mL    | 1.0 mL    | 0         | 0         | 0         |
| Ligand<br>(0.001 mol/L)                         | 0         | 0         | 0         | 0.5 mL    | 0.5 mL    | 0.5 mL    |
| Gb(NO <sub>3</sub> ) <sub>3</sub><br>(0.1mol/L) | 1.0 mL    | 0         | 0         | 1.0 mL    | 0         | 0         |
| Tb(NO <sub>3</sub> ) <sub>3</sub><br>(0.1mol/L) | 0         | 1.0 mL    | 0         | 0         | 1.0 mL    | 0         |
| Eu(NO <sub>3</sub> ) <sub>3</sub><br>(0.1mol/L) | 0         | 0         | 1.0 mL    | 0         | 0         | 1.0 mL    |
| NaF<br>(0.4 mol/L)                              | 1.0 mL    |
| DMSO                                            | 2.0 mL    | 2.0 mL    | 2.0 mL    | 2.5 mL    | 2.5 mL    | 2.5 mL    |

**Table S2** Experimental details about the preparation of TPEBA-Tb-Eu composite materials

|                                                  | TPEBA-Tb-Eu-A | TPEBA-Tb-Eu-B | TPEBA-Tb-Eu-C |
|--------------------------------------------------|---------------|---------------|---------------|
| Ligand<br>(0.010 mol/L)                          | 1.0 mL        | 0             | 0             |
| Ligand<br>(0.005 mol/L)                          | 0             | 0.4 mL        | 0             |
| Ligand<br>(0.001 mol/L)                          | 0             | 0             | 0.4 mL        |
| Tb(NO <sub>3</sub> ) <sub>3</sub><br>(0.1 mol/L) | 980 μL        | 970 μL        | 950 μL        |
| Eu(NO <sub>3</sub> ) <sub>3</sub><br>(0.1 mol/L) | 20 μL         | 30 μL         | 50 μL         |
| NaF<br>(0.4 mol/L)                               | 1.0 mL        | 1.0 mL        | 1.0 mL        |
| DMSO                                             | 2.0 mL        | 2.6 mL        | 2.6 mL        |

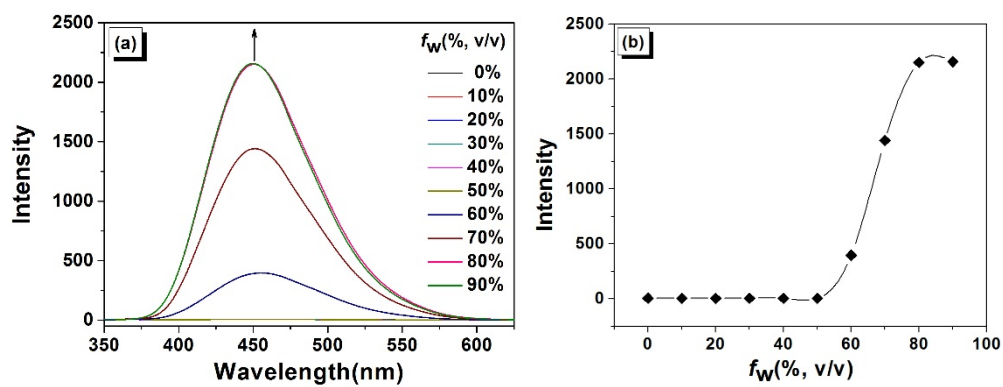

**Fig. S1** AIE behavior (a) and plots of the fluorescence intensity at 460 nm (b) of TPEBA dissolved in DMSO/water mixtures with different water fractions ( $\lambda_{ex}=340$  nm).

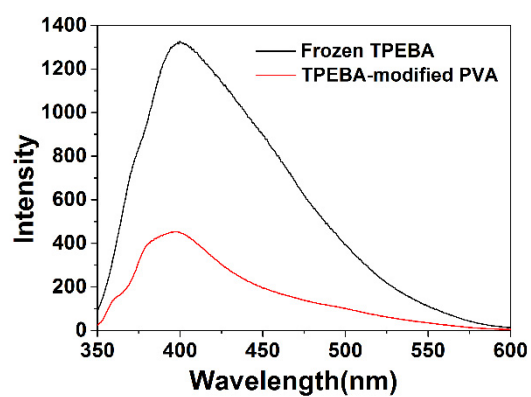

**Fig. S2** Fluorescence of the frozen diluted TPEBA solution ( $1.0 \times 10^{-4}$  mol/L) dissolved in DMSO (black line) and TPEBA modified PVA with low amount of TPEBA dispersed in DMSO (red line) respectively.

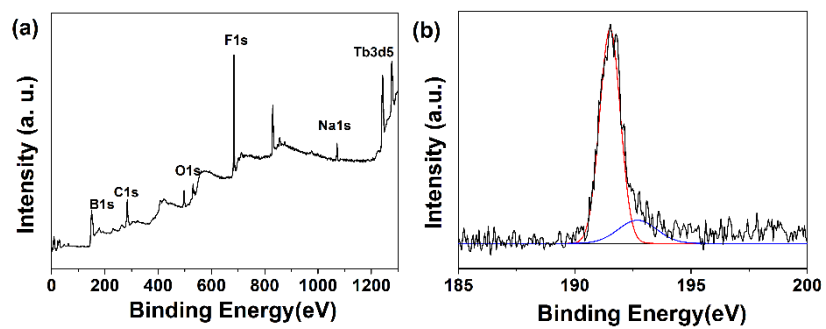

**Fig. S3** XPS survey (a) and B1s XPS (b) spectra of TPEBA decorated NaTbF<sub>4</sub> nanoparticles.

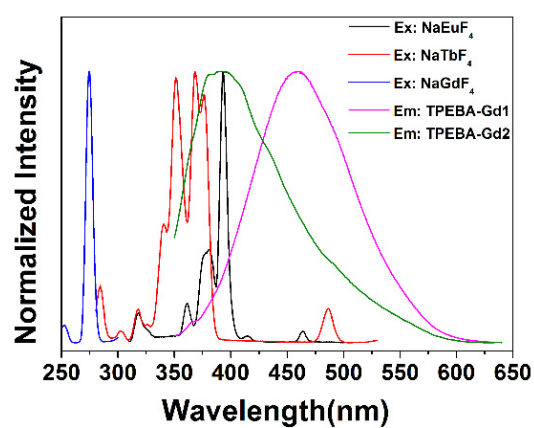

**Fig. S4** Emission spectrum of the TPEBA decorated  $\beta$ -NaGdF<sub>4</sub> (TPEBA-Gd1: mole ratio of TPEBA and Gd is 4.5; TPEBA-Gd2: mole ratio of TPEBA and Gd is 0.8) and excitation spectrum of PVA-coated  $\beta$ -NaGdF<sub>4</sub>,  $\beta$ -NaTbF<sub>4</sub> and  $\beta$ -NaEuF<sub>4</sub>.



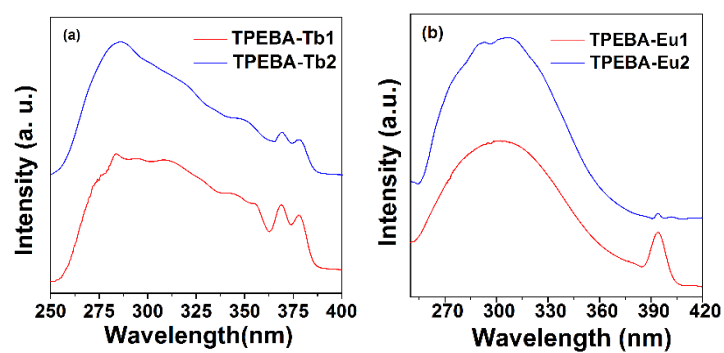

**Fig. S5** Excitation spectrum of the TPEBA-Tb1 and TPEBA-Tb2 ( $\lambda_{em}=540$  nm) (a); Excitation spectrum of the TPEBA-Eu1 and TPEBA-Eu2 ( $\lambda_{em}=613$  nm) (b).

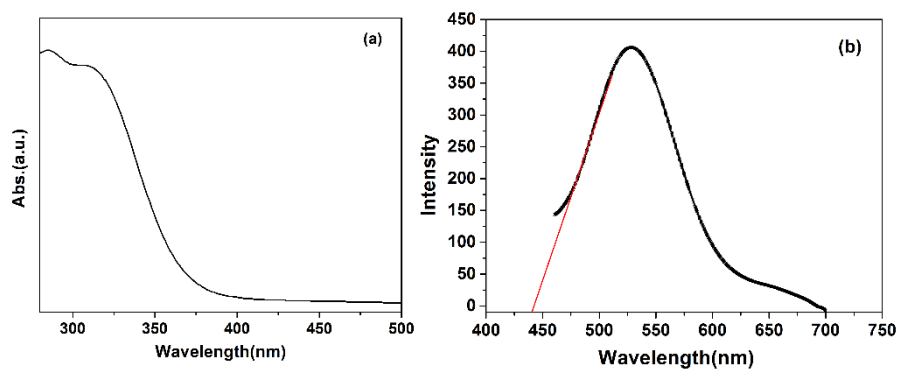

**Fig. S6** UV-Vis absorption spectrum of the ligand and (b) phosphorescence spectrum of TPEBA-Gd2 at 77 K.

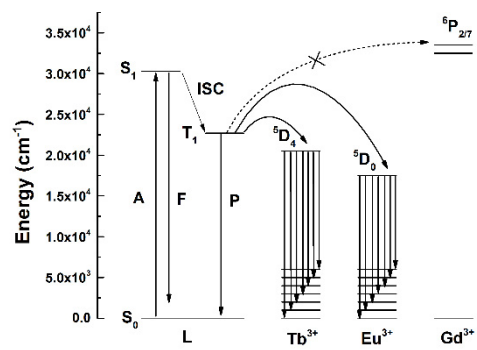

**Fig. S7** Schematic representation of the energy transfer process between ligand to Ln<sup>3+</sup>.

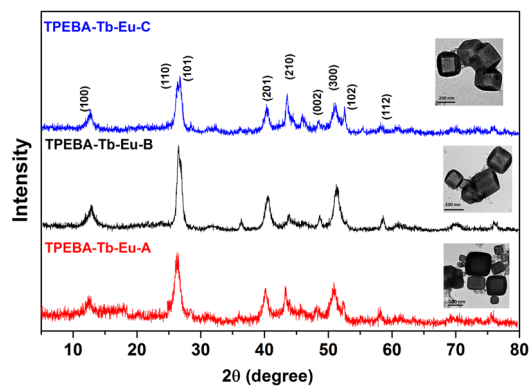

**Fig. S8** Powder XRD patterns and TEM images of TPEBA-decorated lanthanide nanoparticles with different mole ratio of TPEBA, Tb<sup>3+</sup> and Eu<sup>3+</sup>.

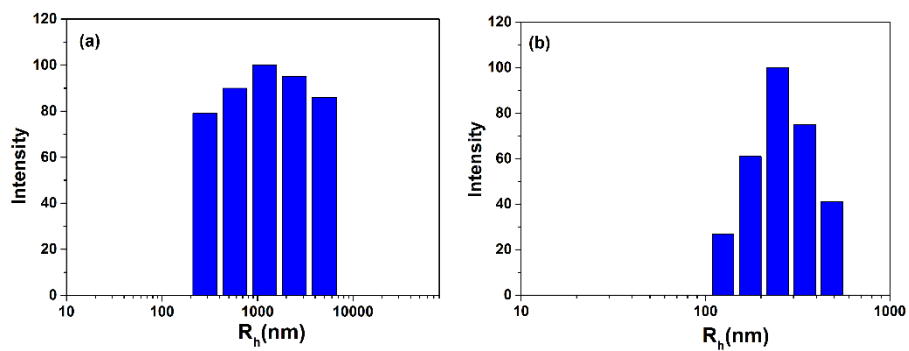

**Fig. S9** Hydrodynamic radius distributions of PVA-1(a) and PVA-2(b) in DMSO (4mg/mL).

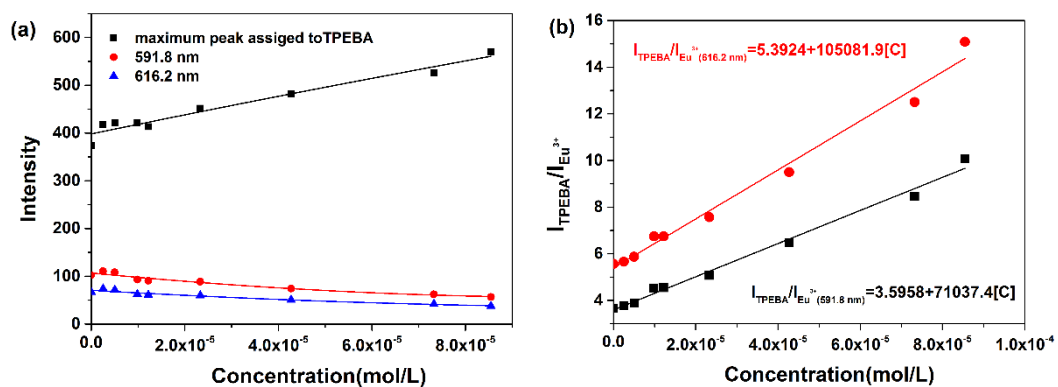

**Fig. S10** The changes in the intensity of the emission peak assigned to the TPEBA (maximum peak from 400nm to 470 nm), and the luminescence belonged to Eu<sup>3+</sup> located at 591.8 nm and 616.2 nm when the increasing concentration of PVA-1 was added into the TPEBA-decorated lanthanide nanoparticles (a); The linear relationship between  $I_{TPEBA}/I_{Eu^{3+}}$  and the increasing concentration of PVA-1 (b).

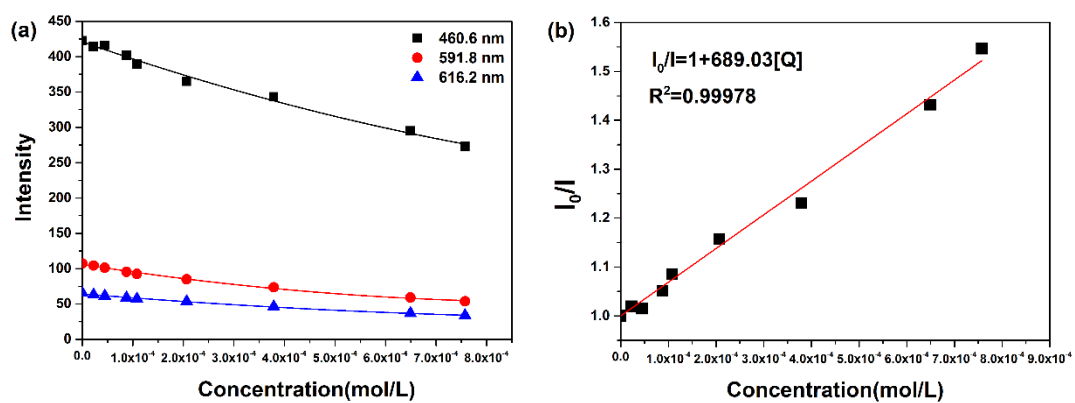

**Fig. S11** The decreasing intensity of the emission peak located at 460.6 nm, 591.8 nm and 616.2 nm when the increasing concentration of PVA-2 was added into the TPEBA-decorated lanthanide nanoparticles (a); Stern-Volmer plots of the quenching (460.6 nm) by PVA-2 (b).
